# Supplementary material for: Comparative Analysis of Active Ingredients and Potential Bioactivities of Essential Oils from Artemisia argyi and A. verlotorum
Source: MDPI journal article supplement (doi:10.3390/molecules28093927), 2023-05-06
Supplement: s1 [file s1]

## SUPPLEMENTARY MATERIAL

### **Comparative analysis of active ingredients and potential bioactivities of essential oils from *Artemisia argyi* and *A. verlotorum***

Yun-Fen Wang,<sup>a,d</sup> Yang Zheng,<sup>b,d</sup> Yang Feng,<sup>a</sup> Hao Chen,<sup>a</sup> Shao-Xing Dai,<sup>b</sup> Yifei Wang,<sup>c,\*</sup> and Min Xu<sup>a,\*</sup>

<sup>a</sup> Center for Pharmaceutical Sciences, Faculty of Life Science and Technology, Kunming University of Science and Technology, Chenggong Campus, Kunming 650500, China

<sup>b</sup> State Key Laboratory of Primate Biomedical Research; Institute of Primate Translational Medicine, Kunming University of Science and Technology, Kunming, Yunnan, 650500, China

<sup>c</sup> Guangzhou Jinan Biomedicine Research and Development Center, Institute of Biomedicine, College of Life Science and Technology, Jinan University, Guangzhou, 510632, China

<sup>d</sup> These authors contributed equally to this work.

\*Correspondence: xumin@kust.edu.cn (M.X.); twang-yf@163.com (Y.W.);

Tel.: +86-0871-65920253

## Supplementary material

|           | Content                                                       | Page |
|-----------|---------------------------------------------------------------|------|
| Table S1  | Composition of the EOs from <i>Artemisia</i> .                | 3    |
| Table S2  | Common components of EOs.                                     | 7    |
| Table S3  | Numbering correspondence table for Figure 4.                  | 9    |
| Figure S1 | The Yields of EOs of <i>Artemisia</i> .                       | 10   |
| Figure S2 | Ingredient-Target-pathway network of EOs.                     | 11   |
| Figure S3 | R cluster analysis.                                           | 15   |
| Figure S4 | Gene Ontology (GO) analysis.                                  | 16   |
| Figure S5 | Total Ions Chromatograms (TIC) of EOs from <i>Artemisia</i> . | 20   |

**Table S1.** Composition of the EOs from *Artemisia*.

| Compound name                    | Content (%)       |                   |                   |                   | Mass  | RI(exp) | RI(lit) | ID <sup>b</sup> |
|----------------------------------|-------------------|-------------------|-------------------|-------------------|-------|---------|---------|-----------------|
|                                  | YP-1 <sup>a</sup> | YP-2 <sup>a</sup> | YP-3 <sup>a</sup> | YP-4 <sup>a</sup> |       |         |         |                 |
| neointermedeol                   | 9.69              | 8.02              | 4.72              | 2.79              | 222.2 | 1629    |         | MS              |
| caryophyllene                    | 8.73              | 9.24              | 1.02              | 3.8               | 204.2 | 1396    | 1416    | RI, MS          |
| caryophyllene oxide              | 5.93              | 3.42              | 17.06             | 23.7              | 220.2 | 1557    | 1579    | RI, MS          |
| <i>cis</i> -chrysanthanol        | 5.92              |                   |                   |                   | 152.2 | 1145    | 1161    | RI, MS          |
| eucalyptol                       | 5.77              | 11.51             |                   |                   | 154.1 | 1013    | 1030    | RI, MS          |
| (-)-4-terpinenol                 | 5.47              | 5.68              |                   |                   | 154.2 | 1159    | 1182    | RI, MS          |
| 2-borneol                        | 4.54              | 10.09             | 0.52              | 2.86              | 154.2 | 1147    | 1165    | RI, MS          |
| $\alpha$ -terpineol              | 3.21              | 3.23              |                   |                   | 154.2 | 1172    | 1187    | RI, MS          |
| (-)- <i>cis</i> -verbenol        | 2.81              |                   |                   |                   | 152.2 | 1125    | 1140    | RI, MS          |
| caryophylladienol I              | 2.42              | 1.15              | 3.16              | 2.42              | 220.4 | 1607    | 1640    | RI, MS          |
| <i>cis</i> -carveol              | 2.35              | 3.06              |                   | 0.12              | 152.2 | 1199    | 1226    | RI, MS          |
| germacrene D                     | 1.7               | 1.98              |                   |                   | 204.2 | 1456    | 1478    | RI, MS          |
| spainulenol                      | 1.58              | 1.06              |                   |                   | 220.4 | 1552    | 1574    | RI, MS          |
| <i>cis</i> -p-menth-2-en-1-ol    | 1.49              | 2.08              |                   |                   | 154.3 | 1111    | 1136    | RI, MS          |
| ( <i>E</i> )- $\beta$ -famesene  | 1.46              |                   |                   |                   | 204.4 | 1432    | 1455    | RI, MS          |
| artemisia alcohol                | 1.38              | 2.63              |                   |                   | 154.2 | 1065    | 1083    | RI, MS          |
| <i>cis</i> -piperitol            | 1.33              | 1.4               |                   |                   | 154.2 | 1187    | 1193    | RI, MS          |
| chamazulene                      | 1.25              | 0.53              |                   |                   | 184.3 | 1700    |         | MS              |
| humulene                         | 0.97              | 0.97              | 0.36              | 5.87              | 204.4 | 1428    | 1451    | RI, MS          |
| $\beta$ -selinene                | 0.95              | 0.82              | 1.15              | 1.36              | 204.4 | 1461    | 1483    | RI, MS          |
| <i>trans</i> -4-thujanol         | 0.83              | 1.45              |                   |                   | 154.2 | 1079    | 1065    | RI, MS          |
| $\gamma$ -terpinene              | 0.72              | 0.81              |                   |                   | 136.2 | 1040    | 1057    | RI, MS          |
| 4-thujanol                       | 0.72              |                   |                   |                   | 154.3 | 1048    | 1068    | RI, MS          |
| <i>n</i> -hexadecanoic acid      | 0.69              |                   | 1.78              |                   | 256.4 | 1933    |         | MS              |
| 4(15),5,10(14)-Germacatrien-1-ol | 0.68              | 0.3               | 1.07              | 0.73              | 220.4 | 1658    |         | MS              |
| phytol                           | 0.57              | 0.12              | 1.46              | 0.31              | 220.4 | 2077    |         | RI, MS          |
| ( $\pm$ )-phytone                | 0.51              | 0.2               | 3.34              | 1.8               | 268.5 | 1812    |         | RI, MS          |
| selina-4,11-diene                | 0.49              | 0.3               |                   |                   | 218.3 | 1450    | 1492    | RI, MS          |
| eugenol                          | 0.45              | 0.84              |                   |                   | 164.2 | 1335    | 1354    | RI, MS          |
| bicyclogermacren                 | 0.43              | 0.45              |                   |                   | 204.4 | 1471    | 1491    | RI, MS          |
| copaene                          | 0.4               | 0.39              |                   |                   | 204.4 | 1352    | 1375    | RI, MS          |
| eremophyllene                    | 0.39              | 0.19              |                   |                   | 204.4 | 1564    | 1507    | MS              |
| $\tau$ -cadinol                  | 0.34              | 0.23              |                   |                   | 222.4 | 1613    | 1638    | RI, MS          |
| yogomi alcohol                   | 0.33              | 0.97              |                   |                   | 154.3 | 983     | 1000    | RI, MS          |
| $\gamma$ -pironene               | 0.31              | 0.36              |                   |                   | 136.2 | 1313    | 1338    | RI, MS          |
| (+)- $\delta$ -cadinene          | 0.3               | 0.25              |                   |                   | 204.4 | 1497    | 1469    | RI, MS          |
| carveol                          | 0.28              | 0.3               |                   |                   | 152.2 | 1209    | 1200    | RI, MS          |
| hexadecanoic acid, methyl ester  | 0.28              |                   |                   |                   | 270.5 | 1893    |         | RI, MS          |
| junenol                          | 0.26              | 0.2               |                   |                   | 222.4 | 1589    | 1606    | RI, MS          |

|                                                                                      |      |      |      |      |       |      |      |        |
|--------------------------------------------------------------------------------------|------|------|------|------|-------|------|------|--------|
| (±)-piperitone                                                                       | 0.26 | 0.21 |      |      | 152.2 | 1232 | 1250 | RI, MS |
| perillaldehyde                                                                       | 0.25 | 0.33 |      |      | 152.2 | 1252 | 1268 | RI, MS |
| alloaromadendrene                                                                    | 0.24 |      |      |      | 204.4 | 1575 | 1463 | RI, MS |
| nerolidol                                                                            | 0.23 |      |      |      | 222.4 | 1537 | 1560 | RI, MS |
| (-)-carvone                                                                          | 0.23 | 0.3  |      |      | 150.2 | 1222 | 1190 | RI, MS |
| Camphor                                                                              | 0.21 |      |      |      | 152.2 | 1263 | 1277 | RI, MS |
| $\beta$ -copaene                                                                     | 0.2  | 0.27 |      |      | 204.4 | 1403 | 1429 | RI, MS |
| 1-octen-3-ol                                                                         | 0.2  | 0.34 |      |      | 128.2 | 963  | 978  | RI, MS |
| methyl isocostate                                                                    | 0.2  |      |      |      | 248.4 | 1754 |      | MS     |
| 9,12-octadecadienoic acid, methyl ester                                              | 0.18 |      |      |      | 294.5 | 2059 |      | MS     |
| $\alpha$ -terpinene                                                                  | 0.18 | 0.4  |      |      | 136.2 | 999  | 1015 | RI, MS |
| linolenic acid, methyl ester                                                         | 0.18 |      |      |      | 292.5 | 2065 |      | MS     |
| o-cymene                                                                             | 0.17 |      |      |      | 134.2 | 1007 | 1020 | RI, MS |
| (-)- $\beta$ -bourbonene                                                             | 0.17 | 0.12 |      |      | 204.4 | 1360 | 1381 | RI, MS |
| methyleugenol                                                                        | 0.17 | 0.21 |      |      | 178.2 | 1382 | 1400 | RI, MS |
| $\gamma$ -costol                                                                     | 0.17 |      |      |      | 220.4 | 1718 |      | MS     |
| camphene                                                                             | 0.13 |      |      |      | 136.2 | 1570 | 954  | RI, MS |
| <i>cis</i> -chrysanthanol acetate                                                    | 0.13 |      |      |      | 194.3 | 1239 | 1260 | RI, MS |
| $\alpha$ -bergamotene                                                                | 0.13 |      | 0.84 |      | 204.4 | 1410 | 1431 | RI, MS |
| <i>epi</i> - $\beta$ -caryophyllene                                                  | 0.13 |      | 0.2  | 0.53 | 204.4 | 1637 |      | MS     |
| bornyl isovalerate                                                                   | 0.12 |      |      |      | 238.4 | 1491 | 1468 | RI, MS |
| (±)-filifolone                                                                       | 0.12 | 0.28 |      |      | 150.2 | 1084 | 1107 | RI, MS |
| $\gamma$ -muurolene                                                                  | 0.11 |      | 1.15 |      | 204.4 | 1488 | 1474 | RI, MS |
| geranyl- $\alpha$ -terpinene                                                         | 0.11 |      |      |      | 272.5 | 1919 |      | MS     |
| sclareol oxide                                                                       | 0.11 |      |      |      | 262.4 | 1849 |      | MS     |
| (1 $\alpha$ ,3 $\alpha$ ,5 $\alpha$ )-1,5-diethenyl-3-methyl-2-methylene-cyclohexane | 0.1  |      |      |      | 216.2 | 1676 |      | MS     |
| $\beta$ -costol                                                                      |      | 0.21 | 0.76 | 0.21 | 220.4 | 1737 |      | MS     |
| bornyl acetate                                                                       |      | 0.28 |      | 0.16 | 196.3 | 1263 | 1282 | RI, MS |
| isogermacrene D                                                                      |      | 0.12 |      |      | 218.4 | 1418 | 1444 | RI, MS |
| p-cymene                                                                             |      | 0.41 |      |      | 134.2 | 1006 | 1023 | RI, MS |
| isoborneol, isovalerate                                                              |      | 0.1  |      |      | 154.3 | 1490 | 1520 | RI, MS |
| <i>cis</i> - $\beta$ -farnesene                                                      |      | 0.86 | 0.42 | 0.83 | 204.4 | 1431 |      | MS     |
| (+)-2-bornanone                                                                      |      | 5.14 |      |      | 152.2 | 1124 | 1132 | RI, MS |
| 2,3-dehydro-1,8-cineole                                                              |      | 0.28 |      |      | 152.2 | 971  | 989  | RI, MS |
| 2-ethylidene-6-methyl-3,5-heptadienal                                                |      | 0.16 |      |      | 150.2 | 1375 | 1126 | MS     |
| 1-(1-butynyl) cyclopentanol                                                          |      | 0.37 |      |      | 138.2 | 1167 |      | MS     |
| $\gamma$ -cadinene                                                                   |      | 0.14 | 0.66 | 0.59 | 204.2 | 1618 |      | MS     |
| $\beta$ -elemene                                                                     |      | 0.11 |      | 0.4  | 204.4 | 1367 | 1390 | RI, MS |
| $\beta$ -bisabolene                                                                  |      | 0.1  | 0.35 | 0.46 | 204.4 | 1537 | 1511 | RI, MS |
| trimethylenenorbornane                                                               |      | 0.19 |      |      | 136.2 | 1135 |      | RI, MS |

|                                                             |      |      |      |       |      |      |        |
|-------------------------------------------------------------|------|------|------|-------|------|------|--------|
| chrysanthenone                                              | 0.35 |      |      | 150.2 | 1373 | 1127 | RI, MS |
| alloaromadendrene oxide                                     | 0.23 | 0.5  |      | 220.4 | 1593 | 1462 | RI, MS |
| $\alpha$ -himachalene                                       | 0.15 |      | 0.14 | 204.4 | 1572 | 954  | RI, MS |
| ledane                                                      |      |      | 0.32 | 204.4 | 1512 | 1497 | RI, MS |
| palustrol                                                   |      | 0.97 | 1.57 | 222.4 | 1540 | 1566 | RI, MS |
| ledol                                                       |      | 2.52 | 2.69 | 222.2 | 1575 | 1568 | RI, MS |
| himbaccol                                                   |      | 3.56 | 3.59 | 222.4 | 1565 | 1589 | RI, MS |
| mustakone                                                   |      | 1.84 | 1.1  | 218.3 | 1650 |      | RI, MS |
| (+)- $\alpha$ -cyperone                                     |      |      | 0.74 | 218.3 | 1593 | 1739 | RI, MS |
| ( $\pm$ )- $\alpha$ -curcumene                              |      | 1.87 | 2.64 | 202.3 | 1457 | 1480 | RI, MS |
| $\alpha$ -gurjunene                                         |      | 3.82 | 0.21 | 204.4 | 1384 | 1407 | RI, MS |
| (+)- $\alpha$ -calacorene                                   |      | 0.56 | 0.86 | 200.3 | 1516 | 1539 | RI, MS |
| (-)- $\alpha$ -muurolene                                    |      |      | 0.37 | 204.4 | 1474 | 1496 | RI, MS |
| neoisolongifolene                                           |      |      | 2.75 | 220.4 | 1630 |      | MS     |
| aromandendrene                                              |      | 0.1  | 0.83 | 204.4 | 1636 |      | MS     |
| $\alpha$ -copaene                                           |      |      | 0.26 | 204.4 | 1351 | 1375 | RI, MS |
| $\delta$ -cadinene                                          |      |      | 3.55 | 204.4 | 1497 | 1511 | RI, MS |
| 1,5-cadinadiene                                             |      |      | 0.44 | 204.4 | 1618 | 1495 | RI, MS |
| eudesma-4,11-diene                                          |      |      | 0.63 | 204.4 | 1449 |      | RI, MS |
| $\beta$ -calacorene                                         |      | 0.19 | 0.47 | 200.3 | 1535 | 1560 | RI, MS |
| isolekene                                                   |      | 0.15 | 0.27 | 204.4 | 1466 | 1377 | RI, MS |
| (-)-calamenene                                              |      |      | 0.53 | 202.3 | 1380 | 1518 | RI, MS |
| $\alpha$ -neocallitropsene                                  |      | 1.04 | 0.48 | 206.4 | 1654 |      | MS     |
| <i>cis</i> -2,2-dimethyl-3-(3-methyl-2-butenyl)-6-methylene |      |      | 0.36 | 158.2 | 1667 |      | MS     |
| cyclohexanemethanol                                         |      |      |      |       |      |      |        |
| (+)- $\beta$ -eudesmol                                      |      | 6.67 | 3.52 | 222.4 | 1622 |      | MS     |
| isopathulenol                                               |      | 3.77 | 2.5  | 220.4 | 1600 | 1630 | RI, MS |
| caryophylladienol II                                        |      | 1.25 | 1.06 | 220.4 | 1603 | 1633 | RI, MS |
| $\tau$ -muurolol                                            |      | 0.17 | 1.04 | 222.4 | 1613 | 1640 | RI, MS |
| isoaromadendrene epoxide                                    |      |      | 0.27 | 220.4 | 1662 |      | MS     |
| terpinen-4-ol                                               |      |      | 0.21 | 154.3 | 1156 | 1175 | RI, MS |
| (-)-myrtenol                                                |      |      | 0.26 | 152.2 | 1174 | 1213 | RI, MS |
| (-)- <i>trans</i> -pinocarveol                              |      |      | 0.29 | 152.2 | 1117 | 1137 | RI, MS |
| linalool                                                    |      |      | 0.1  | 154.3 | 1081 | 1097 | RI, MS |
| <i>l</i> -camphor                                           |      |      | 0.27 | 152.2 | 1122 | 1139 | RI, MS |
| (1 <i>S</i> )-(-)-verbenone                                 |      |      | 0.12 | 150.2 | 1187 | 1204 | RI, MS |
| 4-methylene-5-hexenal                                       |      |      | 0.1  | 110.2 | 1085 | 897  | RI, MS |
| 2,5-dimethyl-3-methylene-1,5-heptadiene                     | 0.31 |      |      | 136.2 | 1591 | 915  | RI, MS |
| 9-(1-methylethylidene)-1,5-cycloundecadiene                 |      |      | 0.31 | 204.4 | 1736 |      | MS     |
| (-)-xanthorrhizol                                           |      | 0.63 |      | 218.3 | 1723 |      | MS     |

|                                                                                                 |              |              |              |              |        |
|-------------------------------------------------------------------------------------------------|--------------|--------------|--------------|--------------|--------|
| 1,1,7,7a-tetramethyl-<br>1a,2,6,7,7a,7b-hexahydro-<br>1 <i>H</i> -cyclopropa[a]-<br>naphthalene | 0.21         | 202.3        | 1761         |              | MS     |
| $\alpha$ -muurolene                                                                             | 0.2          | 204.4        | 1420         | 1440         | RI, MS |
| <i>trans</i> - $\alpha$ -bergamotene                                                            | 0.6          | 204.4        | 1469         | 1438         | RI, MS |
| 8,9-dehydro-<br>neoisolongifolene                                                               | 0.17         | 202.3        | 1795         |              | MS     |
| 1-ethenyl-1-methyl-2,4-<br>bis(1-methylethenyl)-<br>cyclohexane                                 | 0.14         | 204.4        | 1367         | 1389         | RI, MS |
| valerena-4,7(11)-diene                                                                          | 0.16         | 204.4        | 1756         |              | MS     |
| (-)-isocaryophyllene                                                                            | 0.37         | 204.4        | 1689         |              | MS     |
| pentamethylcyclopentadiene                                                                      | 0.53         | 136.2        | 1726         |              | MS     |
| isophytol                                                                                       | 0.11         | 296.3        | 1913         |              | MS     |
| manool oxide                                                                                    | 0.15         | 290.5        | 1978         |              | MS     |
| m-anisalcohol                                                                                   | 3.36         | 138.2        | 1180         | 1198         | RI, MS |
| chlorpyrifos                                                                                    | 0.42         | 350.6        | 1957         |              | MS     |
| 4-methylene-6-(1-<br>propenylidene)-cyclooctene                                                 | 0.11         | 160.3        | 1825         |              | MS     |
| <b>monoterpenoids</b>                                                                           | <b>38.71</b> | <b>31.29</b> | <b>1.05</b>  | <b>4.4</b>   |        |
| <b>sesquiterpenoids</b>                                                                         | <b>38.42</b> | <b>52.01</b> | <b>63.56</b> | <b>77.72</b> |        |
| <b>diterpenoids</b>                                                                             | <b>0.11</b>  |              | <b>0.26</b>  |              |        |
| <b>aromatics</b>                                                                                | <b>2.03</b>  | <b>1.58</b>  | <b>3.36</b>  |              |        |
| <b>aliphatics</b>                                                                               | <b>3.11</b>  | <b>1.03</b>  | <b>6.68</b>  | <b>2.83</b>  |        |
| <b>others</b>                                                                                   |              |              | <b>0.42</b>  |              |        |
| <b>total</b>                                                                                    | <b>82.38</b> | <b>85.91</b> | <b>75.32</b> | <b>84.95</b> |        |

<sup>a</sup> Percent calculated from MS data.; <sup>b</sup>Identification method: MS, identified on the basis of computer matching of the mass spectra with those of the Wiley and Mass Finder libraries and comparison with literature data.

**Table S2.** Common components of EOs.

| Common components of<br>GAEOs and LAEOs | Common components of<br>GAVEOs and LAVEOs | Common components of<br>GAVEOs and LAVEOs |
|-----------------------------------------|-------------------------------------------|-------------------------------------------|
| (-)-4-terpinenol                        | (+)- $\alpha$ -calacorene                 | neointermedeol                            |
| (-)-carvone                             | (+)- $\beta$ -eudesmol                    | caryophyllene                             |
| (-)- $\beta$ -bourbonene                | ( $\pm$ )-phytone                         | caryophyllene oxide                       |
| ( $\pm$ )-filifolone                    | ( $\pm$ )- $\alpha$ -curcumene            | 2-borneol                                 |
| ( $\pm$ )-phytone                       | 2-borneol                                 | caryophylladienol I                       |
| ( $\pm$ )-piperitone                    | aromandendrene                            | humulene                                  |
| 1-octen-3-ol                            | caryophylladienol I                       | $\beta$ -selinene                         |
| 2-borneol                               | caryophylladienol II                      | 4(15),5,10(14)-<br>Germacatrien-1-ol      |
| (+)- $\delta$ -cadinene                 | caryophyllene                             | phytol                                    |
| artemisia alcohol                       | caryophyllene oxide                       | ( $\pm$ )-phytone                         |
| bicyclogermacren                        | <i>cis</i> - $\beta$ -farnesene           |                                           |
| carveol                                 | epi- $\beta$ -caryophyllene               |                                           |
| caryophylladienol I                     | 4(15),5,10(14)-<br>Germacatrien-1-ol      |                                           |
| caryophyllene                           | himbaccol                                 |                                           |
| caryophyllene oxide                     | humulene                                  |                                           |
| chamazulene                             | isodene                                   |                                           |
| <i>cis</i> -carveol                     | isopathulenol                             |                                           |
| <i>cis</i> -piperitol                   | ledol                                     |                                           |
| <i>cis</i> -p-menth-2-en-1-ol           | mustakone                                 |                                           |
| copaene                                 | neointermedeol                            |                                           |
| eremophylene                            | palustrol                                 |                                           |
| eucalyptol                              | phytol                                    |                                           |
| eugenol                                 | $\alpha$ -gurjunene                       |                                           |
| 4(15),5,10(14)-<br>Germacatrien-1-ol    | $\alpha$ -neocallitropsene                |                                           |
| germacrene D                            | $\beta$ -bisabolene                       |                                           |
| humulene                                | $\beta$ -calacorene                       |                                           |
| junenol                                 | $\beta$ -costol                           |                                           |
| methyleugenol                           | $\beta$ -selinene                         |                                           |
| neointermedeol                          | $\gamma$ -cadinene                        |                                           |
| perillaldehyde                          | $\tau$ -muurolol                          |                                           |
| phytol                                  |                                           |                                           |
| selina-4,11-dien                        |                                           |                                           |
| spainulenol                             |                                           |                                           |

trans-4-thujanol

yogomi alcohols

$\alpha$ -terpinene

$\alpha$ -terpineol

$\beta$ -copaene

$\beta$ -selinene

$\gamma$ -pironene

$\gamma$ -terpinene

$\tau$ -cadinol

---



**Table S3.** Numbering correspondence table for Figure 4.

| NO. | compounds              | NO. | compounds                                               | NO. | targets  | NO. | pathway                                           |
|-----|------------------------|-----|---------------------------------------------------------|-----|----------|-----|---------------------------------------------------|
| C1  | $\gamma$ -pironene     | C15 | $\beta$ -calacorene                                     | T1  | NTRK3    | P1  | PI3K-Akt signaling pathway                        |
| C2  | o-cymene               | C16 | pentamethylcyclopentadiene                              | T2  | NOS2     | P2  | Pathways of neurodegeneration - multiple diseases |
| C3  | neointermedeol         | C17 | m-anisalcohol                                           | T3  | NFKB1    | P3  | Pathways in cancer                                |
| C4  | methyleugenol          | C18 | himbaccol                                               | T4  | CNR2     | P4  | Neuroactive ligand-receptor interaction           |
| C5  | junenol                | C19 | caryophyllene oxide                                     | T5  | CHRM4    | P5  | MicroRNAs in cancer                               |
| C6  | eugenol                | C20 | alloaromadendrene oxide                                 | T6  | AR       | P6  | Metabolic pathways                                |
| C7  | eucalyptol             | C21 | 2-borneol                                               | T7  | APOBEC3A | P7  | Chemical carcinogenesis-receptor activation       |
| C8  | cis-carveol            | C22 | 1-ethenyl-1-methyl-2,4-bis(1-methylethenyl)-cyclohexane | T8  | APEX1    | P8  | cAMP signaling pathway                            |
| C9  | chamazulene            | C23 | $\alpha$ -himachalene                                   | T9  | ADRA2C   | P9  | Calcium signaling pathway                         |
| C10 | 1-octen-3-ol           | C24 | bornyl acetate                                          | T10 | ACHE     | P10 | Alzheimer disease                                 |
| C11 | $\beta$ -elemene       | C25 | 9-(1-methylethylidene)-1,5-cycloundecadiene             | T11 | HTR1E    |     |                                                   |
| C12 | trimethylenenorbornane | C26 | (1S)-(-)-verbenone                                      | T12 | NR3C2    |     |                                                   |
| C13 | p-cymene               |     |                                                         | T13 | KDM1A    |     |                                                   |
| C14 | $\beta$ -selinene      |     |                                                         | T14 | GPR55    |     |                                                   |

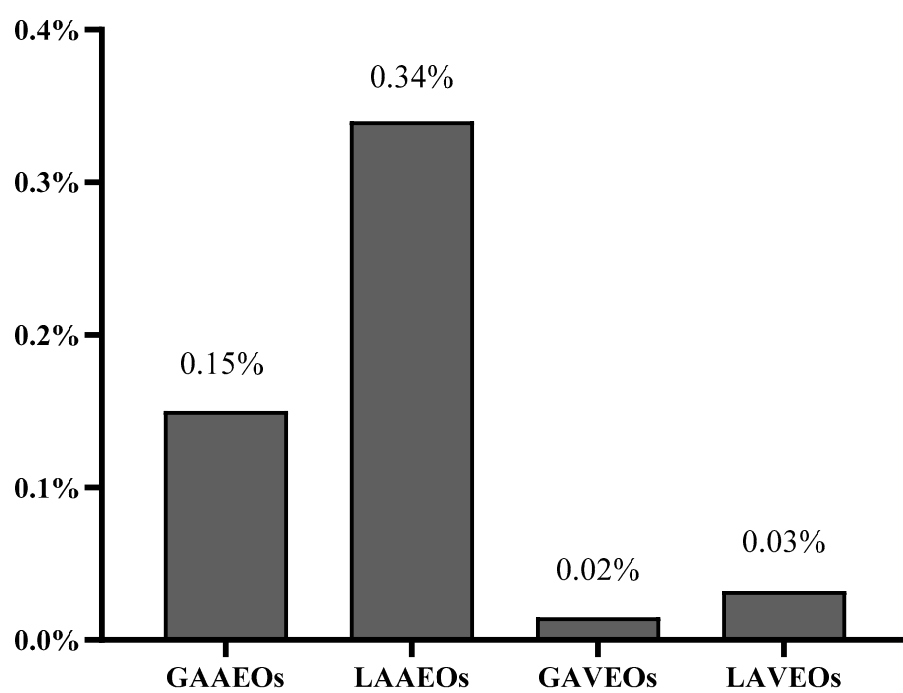

**Figure S1.** The Yields of EOs of *Artemisia*.

GAAEOs

[illegible]



# LAAEOs

|                                                            |                                                       |                                               |                                  |                                          |                                          |                                          |                                     |                                 |                                     |                                             |                                 |                                 |                                                       |                                        |                                                     |                                                     |                                                     |                                                     |                                                     |                                                     |                                                     |                                                     |                                                     |                                                     |                                                     |                                                     |                                                     |                                                     |                                                     |                                                     |                                                     |
|------------------------------------------------------------|-------------------------------------------------------|-----------------------------------------------|----------------------------------|------------------------------------------|------------------------------------------|------------------------------------------|-------------------------------------|---------------------------------|-------------------------------------|---------------------------------------------|---------------------------------|---------------------------------|-------------------------------------------------------|----------------------------------------|-----------------------------------------------------|-----------------------------------------------------|-----------------------------------------------------|-----------------------------------------------------|-----------------------------------------------------|-----------------------------------------------------|-----------------------------------------------------|-----------------------------------------------------|-----------------------------------------------------|-----------------------------------------------------|-----------------------------------------------------|-----------------------------------------------------|-----------------------------------------------------|-----------------------------------------------------|-----------------------------------------------------|-----------------------------------------------------|-----------------------------------------------------|
| (-)-carvone                                                | (±)-piperitone                                        | eremophilene                                  | pentadecahydronaphthalene        | chrysanthemone                           | himachalene                              | (±)-linalone                             | RP50A1                              | PRKCE                           | MGAR                                | CTSD                                        | STAT3                           | APH1A                           | PTD32                                                 | CASP9                                  | CACNA1B                                             | GRM4                                                | GLI2                                                | FDPS                                                | CDK1                                                | TDFT1                                               | ATP4A                                               | C12orf2                                             | BAE1                                                | APP                                                 |                                                     |                                                     |                                                     |                                                     |                                                     |                                                     |                                                     |
| cis-p-menth-2-en-1-ol                                      | selinene                                              | setra-4,11-dien                               | (-)-bairdione                    | caryophyllene                            | eucalyptol                               | -piperone                                | ECN1                                | CHRB2P                          | ALPL                                | HDAC7C                                      | CHRM1                           | PIK3R1                          | LINA                                                  | HSF99A1                                | STPR4                                               | NOTUM                                               | BRD4                                                | HSF99A1                                             | LDH2                                                | PSMB8                                               | GHSK                                                | AURKA2B                                             | LTBR4                                               | UGT2B7                                              |                                                     |                                                     |                                                     |                                                     |                                                     |                                                     |                                                     |
| alloaromadendrene                                          | isobornol                                             | bicyclogermacrene                             | isogermacrene D                  | -costol                                  | germacra-4(15),5E,10(14)-trien-1-ol      | spinelulol                               | ALOX5                               | ACHE                            | CDK4                                | HTB18                                       | HDAC8                           | PDE4B                           | CASA                                                  | HRH1                                   | TUBA1A                                              | HSD17B3                                             | ELM1                                                | NR12                                                | IDH1                                                | F7                                                  | GLAR1                                               | CA3                                                 | CYP2D6                                              | RARB                                                |                                                     |                                                     |                                                     |                                                     |                                                     |                                                     |                                                     |
| oxide-(Ru et al.)                                          | isovalerate                                           |                                               |                                  |                                          |                                          |                                          | FAAH                                | TPH1                            | ANPEP                               | CQZ1                                        | PTGFR                           | S1PR3                           | CA14                                                  | DPY7                                   | SLC2A1                                              | CD38                                                | HTT7                                                | PK3CB                                               | TASN                                                | SCD                                                 | FKBP1A                                              | PFARA                                               | EGFR                                                | ADAM10                                              |                                                     |                                                     |                                                     |                                                     |                                                     |                                                     |                                                     |
|                                                            |                                                       |                                               |                                  |                                          |                                          |                                          | PSMB9                               | CYP17A1                         | ERAP2                               | HDAC2                                       | CHRM1                           | SLC8A9                          | NFRB1                                                 | PSR1                                   | CYP2C19                                             | MAOB                                                | PLAU                                                | ITGB1                                               | CAB                                                 | HTG2C                                               | PDE3A                                               | NG2B                                                | CSNK2B                                              | LY86                                                |                                                     |                                                     |                                                     |                                                     |                                                     |                                                     |                                                     |
| -terpinene                                                 | p-cymene                                              | eugenol                                       | germacrene                       | trans-4-linalol                          | -elemene                                 | -cadinol                                 | DPP5                                | CDTR                            | KDM1A                               | HSD17B1                                     | PROC                            | CTSK                            | AOC3                                                  | GRM5                                   | HTB3A                                               | HTB1F                                               | GRBAP1                                              | OPPL1                                               | PRKCA                                               | HTN4                                                | PTGER3                                              | PORY12                                              | NR2F2                                               | CHRNA4                                              |                                                     |                                                     |                                                     |                                                     |                                                     |                                                     |                                                     |
|                                                            |                                                       |                                               |                                  |                                          |                                          |                                          | KDQA                                | NOS1                            | CYP1A2                              | GRM2                                        | EPHX1                           | RXR8                            | PTGES                                                 | PLA2G1B                                | CEB1                                                | DRD2                                                | APEX1                                               | ALOX12                                              | NGS3                                                | PSMB2                                               | TRIM24                                              | CHRM1                                               | ADORA2A                                             | LPE                                                 |                                                     |                                                     |                                                     |                                                     |                                                     |                                                     |                                                     |
|                                                            |                                                       |                                               |                                  |                                          |                                          |                                          | HDAC5                               | AURKB                           | ITGB3                               | KLF9                                        | KCNAB2                          | SLC8A4                          | PRKCB                                                 | PREP                                   | THRA                                                | PNMT                                                | YES1                                                | MAPK1                                               | TOP2A                                               | S1PR2                                               | HYR2                                                | SDO1                                                | DYRK1A                                              | PDE4A                                               |                                                     |                                                     |                                                     |                                                     |                                                     |                                                     |                                                     |
|                                                            |                                                       |                                               |                                  |                                          |                                          |                                          | CHRM5                               | PRK3CA                          | RORR                                | CXCR6                                       | ICMT                            | CAB2                            | HNR4                                                  | DUSP3                                  | SIRT3                                               | HSD11B1                                             | RORP1                                               | NTK3                                                | CLKA                                                | NME                                                 | CEB1                                                | GLRA1                                               | MAOA                                                | MTOR                                                |                                                     |                                                     |                                                     |                                                     |                                                     |                                                     |                                                     |
|                                                            |                                                       |                                               |                                  |                                          |                                          |                                          | HRH5                                | TEC                             | ADORA1                              | HDAC1                                       | SCN2A                           | TGMD2                           | ALOX5AP                                               | HTB3A                                  | CA12                                                | CAB                                                 | CHRFAM7A                                            | MAPK3                                               | HDAC4                                               | CHRM3                                               | OPN4                                                | TTR                                                 | ADORA1A                                             | LDHA                                                |                                                     |                                                     |                                                     |                                                     |                                                     |                                                     |                                                     |
| 4,7-dimethyl-1-isopropyl-1,2,3,5,6,8-hexahydro-naphthalene | caryophyllene oxide                                   | carveol                                       | juncenol                         | 1-octen-3-ol                             | neotermeneol                             | yogonol alcohol                          | CA1                                 | ADRB1                           | TAAR1                               | TURA                                        | PTK6                            | METAP2                          | TMPS5B                                                | AKR1C3                                 | CHRM4                                               | APOBEC3A                                            | HSD11B2                                             | DHX29                                               | TLR9                                                | GRII2                                               | RARA                                                | NFE2L3                                              | GPR150                                              | PLAT                                                |                                                     |                                                     |                                                     |                                                     |                                                     |                                                     |                                                     |
|                                                            |                                                       |                                               |                                  |                                          |                                          |                                          | HSD17B10                            | MEF                             | PTGS1                               | CACNA1B                                     | CHRNA1                          | MDHR1                           | ITK                                                   | PDGFR4                                 | OPRK1                                               | SLC3A1                                              | MAP7                                                | GLK1                                                | PDGF4                                               | PI3K1                                               | DRD4                                                | RPK3                                                | LEK1                                                | PLIN5                                               |                                                     |                                                     |                                                     |                                                     |                                                     |                                                     |                                                     |
| (+)-2-bornanone                                            | -cadinene                                             | copaene                                       | (-)-4-terpinenol                 | 2-borneol                                | -terpinene                               | 1-(1-butynyl)cyclopentanol               | SIRT1                               | GPR35                           | MDM4                                | CDK5                                        | AKR1C3                          | GRM1                            | HTB3A                                                 | NR1H5                                  | NPRB1                                               | GRIN2B                                              | VDR                                                 | TNFR                                                | ADORA3                                              | MGLL                                                | ESR1                                                | HTHR                                                | PROSP                                               | BCL2A1                                              |                                                     |                                                     |                                                     |                                                     |                                                     |                                                     |                                                     |
|                                                            |                                                       |                                               |                                  |                                          |                                          |                                          | PTPN1                               | CDC25B                          | ABCG2                               | DNMT1                                       | CALR3                           | RELA                            | GRN1                                                  | KIF11                                  | FOR                                                 | SRD5A1                                              | TP53                                                | MC1                                                 | FOLH1                                               | STK3                                                | DCUN1D1                                             | AHR                                                 | GSTH1                                               | TLR9                                                |                                                     |                                                     |                                                     |                                                     |                                                     |                                                     |                                                     |
|                                                            |                                                       |                                               |                                  |                                          |                                          |                                          | SOMAR1                              | DDR1                            | HIF1A                               | NR3C2                                       | RARG                            | CTSL                            | CHRNA7                                                | CYP19A1                                | HNF4A                                               | CCR2                                                | FRRL2                                               | CYP11B1                                             | HICAR2                                              | ENPP1                                               | FZD2                                                | PDZT4                                               | THRB                                                | CNR3                                                |                                                     |                                                     |                                                     |                                                     |                                                     |                                                     |                                                     |
| trimethylenorbornane                                       | caryophylladienol                                     | methyl-eugenol                                | -terpinol                        | 2,3-dehydro-1,8-dioneole                 | artemisia alcohol                        | chamazulene                              | ESR2                                | CHTR5                           | TD11                                | SLC6A2                                      | PTK2B                           | PTN7                            | NO22                                                  | HDAC9                                  | DRD1                                                | SUAT1                                               | PDE3B                                               | RIPK2                                               | NR3C1                                               | ST5                                                 | PLK3CD                                              | SRSF2                                               | PCGT2                                               | TSHR                                                |                                                     |                                                     |                                                     |                                                     |                                                     |                                                     |                                                     |
|                                                            |                                                       |                                               |                                  |                                          |                                          |                                          | ACACB                               | CA7                             | PDGFRB                              | CASR                                        | CDC20A                          | LT4H                            | PTGER4                                                | S1PR3                                  | SLC5A5                                              | RAC1                                                | GUSB                                                | MAP3K14                                             | ACACA                                               | ACE                                                 | CHRNA4                                              | DUT                                                 | CAI                                                 | CNR1                                                |                                                     |                                                     |                                                     |                                                     |                                                     |                                                     |                                                     |
| cis-carveol                                                | bornyl acetate                                        | cis-piperitol                                 | -copaene                         | 2-ethylidene-6-methyl-3,5-heptadienal    |                                          |                                          | CCR1                                | TUBB2B                          | ACCB1                               | RET                                         | PTPN2                           | RXRG                            | GSP31                                                 | CPT2                                   | CTSD                                                | KCNH2                                               | TDG2                                                | CTDSP1                                              | TPR1                                                | EPN1                                                | NR                                                  | HSD17B2                                             | PRKCD                                               | SLC6A1                                              |                                                     |                                                     |                                                     |                                                     |                                                     |                                                     |                                                     |
|                                                            |                                                       |                                               |                                  |                                          |                                          |                                          | ADRA2C                              | SCN3A                           | CTSD3G                              | APOBEC3G                                    | CYP19A1                         |                                 |                                                       |                                        |                                                     |                                                     |                                                     |                                                     |                                                     |                                                     |                                                     |                                                     |                                                     |                                                     |                                                     |                                                     |                                                     |                                                     |                                                     |                                                     |                                                     |
| Cellular senescence                                        | Collecting duct acid secretion                        | EGFR tyrosine kinase inhibitor resistance     | Fc gamma R-mediated phagocytosis | Glycine, serine and threonine metabolism | Human immunodeficiency virus 1 infection | Legionellosis                            | Antigen processing and presentation | Base excision repair            | Central carbon metabolism in cancer | Colorectal cancer                           | beta-Alanine metabolism         | cGMP-PKG signaling pathway      | Complement and coagulation cascades                   | Endocrine resistance                   | Fluid shear stress and atherosclerosis              | Glycosaminoglycan degradation                       | Human T-cell leukemia virus 1 infection             | Leukocyte transendothelial migration                | NOD-like receptor signaling pathway                 | Escherichia coli infection                          | Metabolism of xenobiotics by cytochrome P450        | Prion disease                                       | Regulation of lipolysis in adipocytes               | Small cell lung cancer                              | Thiamine metabolism                                 |                                                     |                                                     |                                                     |                                                     |                                                     |                                                     |
| VEGF signaling pathway                                     | Adrenergic signaling in cardiomyocytes                | Apelin signaling pathway                      | Viral hepatitis B                | African trypanosomiasis                  | Apoptosis                                | Bile secretion                           | Spring lipid signaling pathway      | Thyroid cancer                  | Viral hepatitis B                   | Thyroid hormone signaling pathway           | Viral carcinogenesis            | Protein signaling pathway       | PD-1 expression and PD-1 checkpoint pathway in cancer | Propanoate metabolism                  | Renin secretion                                     | Staphylococcus aureus infection                     | Thyroid hormone synthesis                           | Viral life cycle-HIV-1                              | Alcornoque acid metabolism                          | Arachidonic acid metabolism                         | Biosynthesis of cofactors                           | Chemical carcinogenesis-DNA adducts                 | Cortisol synthesis and secretion                    | Endometrial cancer                                  | Folate biosynthesis                                 | GnRH signaling pathway                              | Hypertrophic cardiomyopathy                         | Lipid and atherosclerosis                           | Mineral absorption                                  |                                                     |                                                     |
| Notch signaling pathway                                    | PD-1 expression and PD-1 checkpoint pathway in cancer | Propanoate metabolism                         | Renin secretion                  | Staphylococcus aureus infection          | Thyroid hormone synthesis                | Viral life cycle-HIV-1                   | Longevity regulating pathway        | Mitochondrial                   | Nucleotide metabolism               | Penicillin and glucuronate interconversions | Prostate cancer                 | Protein signaling pathway       | PD-1 expression and PD-1 checkpoint pathway in cancer | Propanoate metabolism                  | Renin secretion                                     | Staphylococcus aureus infection                     | Thyroid hormone synthesis                           | Viral life cycle-HIV-1                              | Alcornoque acid metabolism                          | Arachidonic acid metabolism                         | Biosynthesis of cofactors                           | Chemical carcinogenesis-DNA adducts                 | Cortisol synthesis and secretion                    | Endometrial cancer                                  | Folate biosynthesis                                 | GnRH signaling pathway                              | Hypertrophic cardiomyopathy                         | Lipid and atherosclerosis                           | Mineral absorption                                  |                                                     |                                                     |
| Hepatitis B                                                | Inflammatory bowel disease                            | Longevity regulating pathway-multiple species | Morphine addiction               | Oocyte meiosis                           | Peroxisome                               | Proteasome                               | ERBB signaling pathway              | Gap junction                    | Hepatitis C                         | Mediator regulation of TRP channels         | Long-term depression            | mTOR signaling pathway          | Cholesterol metabolism                                | Cytokine-cytokine receptor interaction | Estrogen signaling pathway                          | Gastric acid secretion                              | Hepatocellular carcinoma                            | Influenza A                                         | Long-term potentiation                              | Natural killer cell mediated cytotoxicity           | Inositol phosphate metabolism                       | Lysine degradation                                  | Neuroptosis                                         | Oxidative phosphorylation                           | Phenylethylamine metabolism                         | Proteoglycans in cancer                             | Riboflavin metabolism                               | Systemic lupus erythematosus                        | Transcriptional misregulation in cancer             |                                                     |                                                     |
| Aspirate and adenole metabolism                            | Caffeine metabolism                                   | Choline metabolism in cancer                  | Cytosolic DNA-sensing pathway    | Emetrol lipid metabolism                 | Gastric cancer                           | Herpes simplex virus 1 infection         | Yersinia infection                  | alpha-Linolenic acid metabolism | Alcoholism                          | Thyroid disease                             | Calcium signaling pathway       | Cholinergic synapse             | Diabetic cardiomyopathy                               | Fanconi anemia                         | Glycine                                             | HIF-1 signaling pathway                             | Insulin resistance                                  | Lysosome                                            | Neuroactive ligand-receptor interaction             | Malaria                                             | Hippocampal signaling pathway-multiple species      | Insulin signaling pathway                           | MAPK signaling pathway                              | Histidine metabolism                                | Fatty acid metabolism                               | Drug metabolism-cytochrome P450                     | Cardiac muscle contraction                          | Citric acid cycle (TCA cycle)                       | Cell adhesion molecules                             | Cocaine addiction                                   | Cell cycle                                          |
| T cell receptor signaling pathway                          | Tuberculosis                                          | 2-Oxocarboxylic acid metabolism               | Amoebiasis                       | Autophagy-related                        | ABC transporters                         | Angiotensin-converting enzyme inhibition | PI3K/AKT signaling pathway          | Pyrimidine metabolism           | Salivary secretion                  | Tyrosine metabolism                         | TOF-beta signaling pathway      | Raz1 signaling pathway          | Parathyroid hormone synthesis, secretion and action   | Nicotine addiction                     | Parathyroid hormone synthesis, secretion and action |
| NF-kappa B signaling pathway                               | Paraneoplastic secretion                              | Platelet activation                           | Pyruvate metabolism              | Salmonella infection                     | TOF-beta signaling pathway               | Raz1 signaling pathway                   | JAK-STAT signaling pathway          | Measles                         | Human cytomegalovirus infection     | Human cytomegalovirus infection             | Human cytomegalovirus infection | Human cytomegalovirus infection | Human cytomegalovirus infection                       | Human cytomegalovirus infection        | Human cytomegalovirus infection                     | Human cytomegalovirus infection                     | Human cytomegalovirus infection                     | Human cytomegalovirus infection                     | Human cytomegalovirus infection                     | Human cytomegalovirus infection                     | Human cytomegalovirus infection                     | Human cytomegalovirus infection                     | Human cytomegalovirus infection                     | Human cytomegalovirus infection                     | Human cytomegalovirus infection                     | Human cytomegalovirus infection                     | Human cytomegalovirus infection                     | Human cytomegalovirus infection                     | Human cytomegalovirus infection                     | Human cytomegalovirus infection                     | Human cytomegalovirus infection                     |
| Glycophospholipid metabolism                               | Human cytomegalovirus infection                       | Human cytomegalovirus infection               | Human cytomegalovirus infection  | Human cytomegalovirus infection          | Human cytomegalovirus infection          | Human cytomegalovirus infection          | Human cytomegalovirus infection     | Human cytomegalovirus infection | Human cytomegalovirus infection     | Human cytomegalovirus infection             | Human cytomegalovirus infection | Human cytomegalovirus infection | Human cytomegalovirus infection                       | Human cytomegalovirus infection        | Human cytomegalovirus infection                     | Human cytomegalovirus infection                     | Human cytomegalovirus infection                     | Human cytomegalovirus infection                     | Human cytomegalovirus infection                     | Human cytomegalovirus infection                     | Human cytomegalovirus infection                     | Human cytomegalovirus infection                     | Human cytomegalovirus infection                     | Human cytomegalovirus infection                     | Human cytomegalovirus infection                     | Human cytomegalovirus infection                     | Human cytomegalovirus infection                     | Human cytomegalovirus infection                     | Human cytomegalovirus infection                     | Human cytomegalovirus infection                     |                                                     |



# GAVEOs

|                                            |                                                                            |                |                                                         |                                     |        |         |         |          |        |         |        |         |          |         |         |        |          |          |          |         |
|--------------------------------------------|----------------------------------------------------------------------------|----------------|---------------------------------------------------------|-------------------------------------|--------|---------|---------|----------|--------|---------|--------|---------|----------|---------|---------|--------|----------|----------|----------|---------|
| aromadendrene                              | ledol                                                                      | m-anisalcohol  | caryophylladienol                                       | germacra-4(15),5E,10(14)-trien-1-ol | HDAC8  | CHRNA4  | DHODH   | ANPEP    | HTR8   | NOS2    | PSMB1  | SOX11   | GPR39    | ADRA2B  | HSD11B1 | HIF1A  | MTNR1B   | HLA23G1b | CA3      | CEST1   |
| trans--bergamotene                         | -muurolol                                                                  | palustrol      | isodlene                                                | neonfermedol                        | FFR2   | OPRL1   | PRKCA   | CA1      | CD38   | AHR     | RORA   | PTGS2   | CXCR6    | TNFR    | PDE4B   | STK3   | CRHR1    | CONE1    | ATAD2    | STAT3   |
| epi--caryophyllene                         | -cadinene                                                                  | mustakone      | 1-ethenyl-1-methyl-2,4-bis(1-methylethenyl)-cyclohexane | -calacorene                         | NOS1   | ITK     | CNR2    | AP0BCE3A | ADRA2A | GRIN1   | HTR7   | NOS3    | PSMB2    | NR2F2   | GSTP1   | CDC28C | HSD11B2  | PLIN1    | MTOR     | CA5B    |
| (±)-curcumene                              | 1,1,7,7a-tetramethyl-1a,2,6,7,7a,7b-hexahydro-1H-cyclopropa[a]-naphthalene | -selinene      | caryophylladienol                                       | pentamethylcyclopentadiene          | UGT2B7 | KCNA3   | TEC     | MAPK14   | ESR2   | HRH1    | LDHA   | KCNH2   | NTRK3    | RELA    | HDAC4   | TOP2A  | OPRK1    | TDO2     | NR2E3    | RAC1    |
| alloaromadendrene oxide (Ru et al.)        | -neocallitropsene                                                          | (+)-calacorene | 8,9-dehydro-neoisolongifolene                           | caryophyllene oxide                 | ATP4A  | NR1E2   | GRIA2   | ACACA    | DRD5   | PTPN2   | CTSD   | FCGR1   | APEX1    | LTAAH   | KIF11   | TLR9   | SLC2A1   | CA8      | AR       | RARA    |
| (+)-eudesmol                               | -costol                                                                    | isopathulenol  | -muurolene                                              | -gurjunene                          | PLIN5  | DCUN1D1 | RIPK3   | DUT      | BCL2A1 | GRIN2B  | E2F2   | WDR3    | HTR3A    | CHRM1   | P2RX7   | CLK4   | SLC6A3   | CA13     | PDE3A    | AKR1G3  |
| 4-methylene-6-(1-propenylidene)-cycloctene | (-)-xanthorrhizol                                                          | caryophyllene  | -muurolene                                              | (-)-isocaryophyllene                | CA12   | GLS     | TAA1    | VDR      | GPBAR1 | KDM1A   | BRD4   | HTR1B   | MAOA     | PPARA   | EGLN1   | TLR4   | SLC6A2   | F7       | CACNA1B  | CYP19A1 |
| 2-borneol                                  | valerena-4,7(11)-diene                                                     | chlorpyrifos   | himbaccol                                               |                                     | CSAR1  | STS     | RARB    | METAP2   | CA14   | ALOX5AP | MDM4   | NFE2L2  | HSD17B10 | NG2L    | XDH     | DPF4   | AP0BCE3G | MAPK1    | CA9      | ADAM10  |
|                                            |                                                                            |                |                                                         |                                     | FFAR4  | PRK3CA  | CYP3A4  | CHRM2    | PTPN1  | KCNK9   | PTGS1  | GALR3   | THRA     | S1PR6   | SAE1    | KLF5   | TTP1     | GRM2     | CDK5     | ADRA2C  |
|                                            |                                                                            |                |                                                         |                                     | FFR1   | HTR1E   | MAOB    | PSMB9    | DRP8   | SLC6A3  | CASP9  | ESR1    | ACHE     | SCN5A   | CDC25B  | FAAH   | SCN2A    | PRK3CB   | CLK2     | OLSF3   |
|                                            |                                                                            |                |                                                         |                                     | KCNA3  | CHRM3   | PRKCE   | RORA     | CHRM5  | ABCB1   | SCN3A  | S1PR4   | CNR1     | AAK1    | TUBB2B  | PNMT   | HCAAR2   | MAP3K14  | CA4      | QRFP    |
|                                            |                                                                            |                |                                                         |                                     | DHR4   | CHRM4   | CYP17A1 | ALOX15   | HTR2C  | NR3C2   | RARG   | PSMB9   | PRCP     | HDAC11  | SLC6A4  | TRIM24 | MARK3    | CHRFAM7A | GPR35    | PKA4    |
|                                            |                                                                            |                |                                                         |                                     | PDE3B  | TUBA1A  | GRM4    | BLM      | GRM5   | CACNA1H | KEAP1  | PLAT    | CSNK2B   | RPS9KB1 | CLK1    | CDK4   | PTX2B    | CPT2     | HSP90AA1 | PKC3R1  |
|                                            |                                                                            |                |                                                         |                                     | ALPL   | CHRNA4  | TMPS90  | GLRA1    | HTR5A  | NFKB1   | TDP1   | SLC6A1  | CES2     | DRD1    | CHRNA7  | NR3C1  | DYRK1A   | PCP      | HDAC2    | MTNR1A  |
|                                            |                                                                            |                |                                                         |                                     | PDGFRB | ADORA1  | HDAC10  | ALOX12   | CXCR4  | S1PR2   | PDGFR4 | HSD17B3 | MIF      | AURKB   | ITGB3   | CTSB   | PDE7A    | P2RY12   | DPP9     | MC4R    |
|                                            |                                                                            |                |                                                         |                                     | FFR2   | DRD2    | PROC    | HSP90A1  | RIPK2  | CA7     |        |         |          |         |         |        |          |          |          |         |

|                                               |                                                          |                                                 |                                            |                                                   |                                                      |                                                            |                                           |                                                 |                                   |                                     |                                       |                                                        |                                        |                                          |                                          |                        |
|-----------------------------------------------|----------------------------------------------------------|-------------------------------------------------|--------------------------------------------|---------------------------------------------------|------------------------------------------------------|------------------------------------------------------------|-------------------------------------------|-------------------------------------------------|-----------------------------------|-------------------------------------|---------------------------------------|--------------------------------------------------------|----------------------------------------|------------------------------------------|------------------------------------------|------------------------|
| Cholesterol metabolism                        | Fat digestion and absorption                             | Purine metabolism                               | Dilated cardiomyopathy                     | Porphyria metabolism                              | Autophagy - other                                    | Spinothalamic tract                                        | Viral life cycle                          | HIV-1                                           | Retinol metabolism                | NF-kappa B signaling pathway        | Leukocyte transendothelial migration  | PD-L1 expression and PD-1 checkpoint pathway in cancer | Sphingolipid signaling pathway         | Calcium signaling pathway                | Regulation of actin cytoskeleton         | Endocrine resistance   |
| Cellular senescence                           | Clinical muscle contraction                              | alpha-Linolenic acid metabolism                 | Oxytocin signaling pathway                 | African trypanosomiasis                           | Platinum drug resistance                             | Longevity regulating pathway - multiple species            | Central carbon metabolism in cancer       | Nucleotide metabolism                           | Tryptophan metabolism             | RGC-like receptor signaling pathway | VEGF signaling pathway                | Shigellosis                                            | Rap1 signaling pathway                 | Neuroactive ligand-receptor interaction  | Human immunodeficiency virus 1 infection |                        |
| Hepatocellular carcinoma                      | Measles                                                  | Synaptic vesicle cycle                          | Vascular smooth muscle contraction         | Peroxisome                                        | Phagosome                                            | Systemic lupus erythematosus                               | Adipocytokine signaling pathway           | Insulin resistance                              | Amphetamine addiction             | Lincosic acid metabolism            | Th1 and Th2 cell differentiation      | Chagas disease                                         | Fluid shear stress and atherosclerosis | Leptospirosis                            | Nitrogen metabolism                      |                        |
| MicroRNAs in cancer                           | Influenza A                                              | Small cell lung cancer                          | Mineral absorption                         | Inositol phosphate metabolism                     | Inflammatory bowel disease                           | Protein processing in endoplasmic reticulum                | Renin-angiotensin system                  | AMPK signaling pathway                          | HIF-1 signaling pathway           | Gap junction                        | Chemical carcinogenesis - DNA adducts | Adrenergic signaling in cardiomyocytes                 | Yersinia infection                     | Proteoglycans in cancer                  | Nicotine addiction                       |                        |
| Metabolic pathways                            | Amniotic epithelial cell differentiation                 | Pancreatic cancer                               | Progesterone-mediated oocyte maturation    | Homologous recombination                          | Carbohydrate digestion and absorption                | B cell receptor signaling pathway                          | Aldosterone-regulated sodium reabsorption | Glutathione metabolism                          | mTOR signaling pathway            | Ferroptosis                         | Alcoholism                            | Metabolism of xenobiotics by cytochrome P450           | GnRH signaling pathway                 | C-type lectin receptor signaling pathway | Prior disease                            |                        |
| Chemical carcinogenesis - receptor activation | Cytotoxic DNA-sensing pathway                            | Axon guidance                                   | T cell receptor signaling pathway          | Hepatitis B                                       | Fatty acid biosynthesis                              | Bacterial invasion of epithelial cells                     | Amoebiasis                                | Base excision repair                            | Longevity regulating pathway      | Antifolate resistance               | Long-term potentiation                | Glyceraldehyde-3-phosphate metabolism                  | Epstein-Barr virus infection           | Cocaine addiction                        | Tuberculosis                             |                        |
| Glycerolipid metabolism                       | Protein digestion and absorption                         | Type II diabetes mellitus                       | Fatty acid biosynthesis                    | Pathways of neurodegeneration - multiple diseases | AGE-RAGE signaling pathway in diabetic complications | Epithelial cell signaling in Helicobacter pylori infection | Human cytomegalovirus infection           | Viral carcinogenesis                            | Proteasome                        | Hasidic metabolism                  | Pyruvate metabolism                   | D-Amino acid metabolism                                | Colorectal cancer                      | Steroid biosynthesis                     | Pyrimidine metabolism                    |                        |
| Toll-like receptor signaling pathway          | Chemical carcinogenesis - reactive oxygen species        | Thermogenesis                                   | TNF signaling pathway                      | Retinoid signaling pathway                        | NOD-like receptor signaling pathway                  | Regulation of lipolysis in adipocytes                      | Salmonella infection                      | Alzheimer disease                               | p53 signaling pathway             | Prostate cancer                     | Cell cycle                            | PKC-Akt signaling pathway                              | Tight junction                         | Oocyte matosis                           | Pathways in cancer                       | Thyroid cancer         |
| Leishmaniasis                                 | Relaxin signaling pathway                                | Neurocysticercosis                              | Endocannabinoid signaling                  | Long-term depression                              | Regulation of lipolysis in adipocytes                | Salmonella infection                                       | Alzheimer disease                         | p53 signaling pathway                           | Prostate cancer                   | Cell cycle                          | PKC-Akt signaling pathway             | Tight junction                                         | Oocyte matosis                         | Pathways in cancer                       | Thyroid cancer                           | Endocytosis            |
| Lysosome                                      | Signaling pathways regulating pluripotency of stem cells | Neurotrophin signaling pathway                  | Long-term depression                       | Regulation of lipolysis in adipocytes             | Salmonella infection                                 | Alzheimer disease                                          | p53 signaling pathway                     | Prostate cancer                                 | Cell cycle                        | PKC-Akt signaling pathway           | Tight junction                        | Oocyte matosis                                         | Pathways in cancer                     | Thyroid cancer                           | Endocytosis                              | Tyrosine metabolism    |
| Natural killer cell mediated cytotoxicity     | Biosynthesis of cofactors                                | Antigen processing and presentation             | Toxoplasmosis                              | Protein signaling pathway                         | Fatty acid degradation                               | Insulin secretion                                          | Cytokine-cytokine receptor interaction    | Bleeder cancer                                  | Fatty acid metabolism             | Salivary secretion                  | Chemokine signaling pathway           | Tight junction                                         | Oocyte matosis                         | Pathways in cancer                       | Thyroid cancer                           | Endocytosis            |
| GABAergic synapse                             | Herpes simplex virus infection                           | Phospholipase D signaling pathway               | Cortisol synthesis and secretion           | Autophagy - animal                                | Alcoholic liver disease                              | Dopaminergic synapse                                       | Fc epsilon RI signaling pathway           | Infammatory mediator regulation of TRP channels | PPAR signaling pathway            | Gastric acid secretion              | Drug metabolism - other enzymes       | Melanoma                                               | Fc gamma R signaling pathway           | Ubiquitin mediated proteolysis           | One carbon pool by folate                |                        |
| Arginine and proline metabolism               | Transcriptional misregulation in cancer                  | Proximal tubule cationic amino acid reclamation | Valine, leucine and isoleucine degradation | Choline metabolism in cancer                      | Lysine degradation                                   | Bile secretion                                             | Aschrochic acid metabolism                | Mitochondrial - animal                          | Serotonergic synapse              | Non-alcoholic fatty liver disease   | Coronavirus disease - COVID-19        | Morone addition                                        | Cholinergic synapse                    | Focal adhesion                           |                                          |                        |
| Thyroid hormone synthesis                     | Alkaldosterone synthesis and secretion                   | Glycine / Glutathione metabolism                | ECM-receptor interaction                   | Glycosaminoglycan degradation                     | Hypertrrophic cardiomyopathy                         | Antihypertensive drug metabolism                           | Ascorbate and aldarate metabolism         | Folate biosynthesis                             | Huntington disease                | Thyroid hormone signaling pathway   | Caffeine metabolism                   | Atherosclerosis                                        | Platelet activation                    | MAPK signaling pathway                   | cAMP-PKG signaling pathway               | cAMP signaling pathway |
| Rheumatoid arthritis                          | Melanogenesis                                            | Oxidative phosphorylation                       | Colicoiding duct acid secretion            | Hypertrrophic cardiomyopathy                      | Antihypertensive drug metabolism                     | Ascorbate and aldarate metabolism                          | Folate biosynthesis                       | Huntington disease                              | Thyroid hormone signaling pathway | Caffeine metabolism                 | Atherosclerosis                       | Platelet activation                                    | MAPK signaling pathway                 | cAMP-PKG signaling pathway               | cAMP signaling pathway                   |                        |
| Gastric cancer                                | Hippo signaling pathway                                  | Malaria                                         | Colicoiding duct acid secretion            | Hypertrrophic cardiomyopathy                      | Antihypertensive drug metabolism                     | Ascorbate and aldarate metabolism                          | Folate biosynthesis                       | Huntington disease                              | Thyroid hormone signaling pathway | Caffeine metabolism                 | Atherosclerosis                       | Platelet activation                                    | MAPK signaling pathway                 | cAMP-PKG signaling pathway               | cAMP signaling pathway                   |                        |
| Non-small cell lung cancer                    | Hepatitis C                                              | Hippo signaling pathway - multiple species      | Ethanol metabolism                         | Nicotinate and nicotinamide metabolism            | Antihypertensive drug metabolism                     | Ascorbate and aldarate metabolism                          | Folate biosynthesis                       | Huntington disease                              | Thyroid hormone signaling pathway | Caffeine metabolism                 | Atherosclerosis                       | Platelet activation                                    | MAPK signaling pathway                 | cAMP-PKG signaling pathway               | cAMP signaling pathway                   |                        |
| ROS signaling pathway                         | Breast cancer                                            | Hippo signaling pathway - multiple species      | Ethanol metabolism                         | Nicotinate and nicotinamide metabolism            | Antihypertensive drug metabolism                     | Ascorbate and aldarate metabolism                          | Folate biosynthesis                       | Huntington disease                              | Thyroid hormone signaling pathway | Caffeine metabolism                 | Atherosclerosis                       | Platelet activation                                    | MAPK signaling pathway                 | cAMP-PKG signaling pathway               | cAMP signaling pathway                   |                        |

## LAVEOs

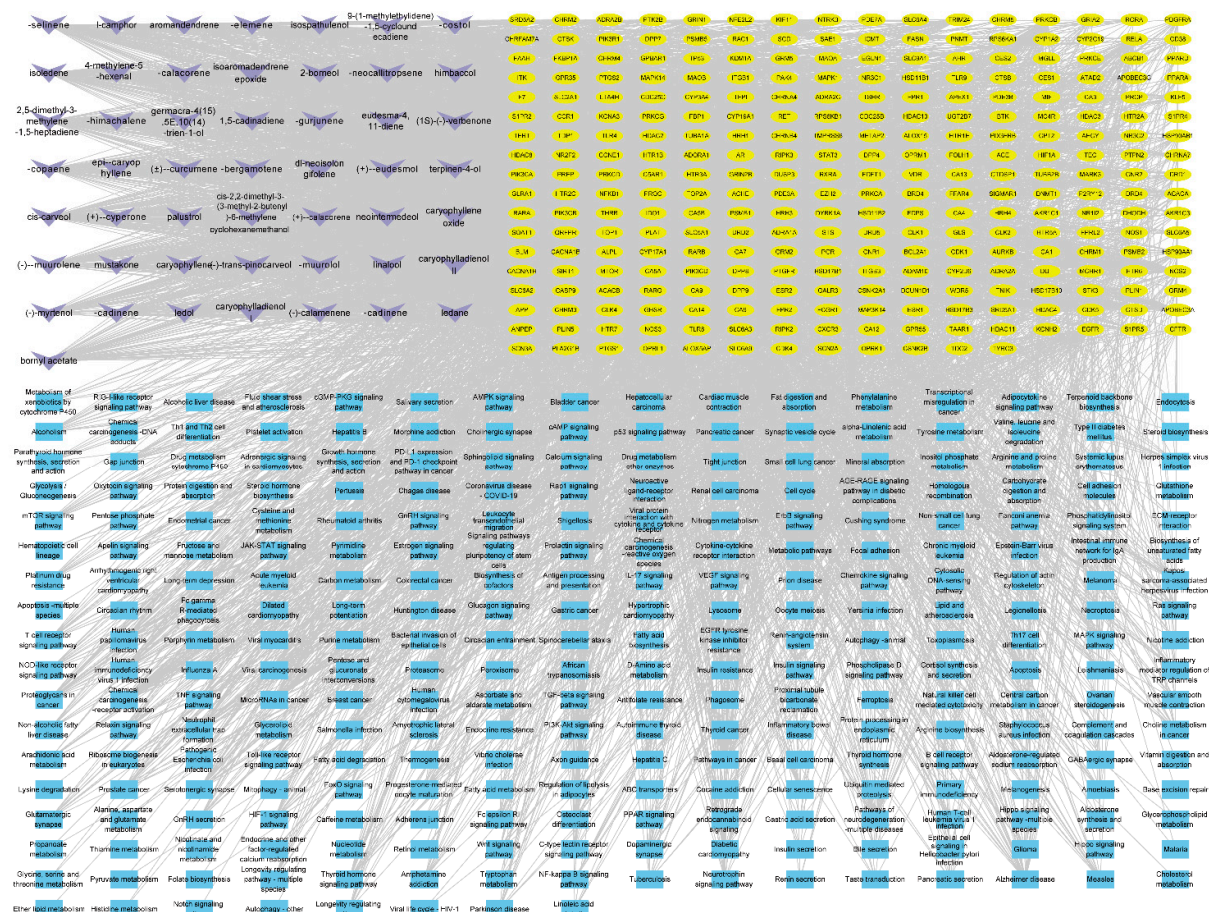

**Figure S2.** Ingredient-Target-pathway network of EOs. The ingredient represented by the purple V. The targets were represented by the yellow ellipse. The pathways were represented by the blue rectangle. The active ingredients were represented by the node, and the edge links the targets and the active ingredients.



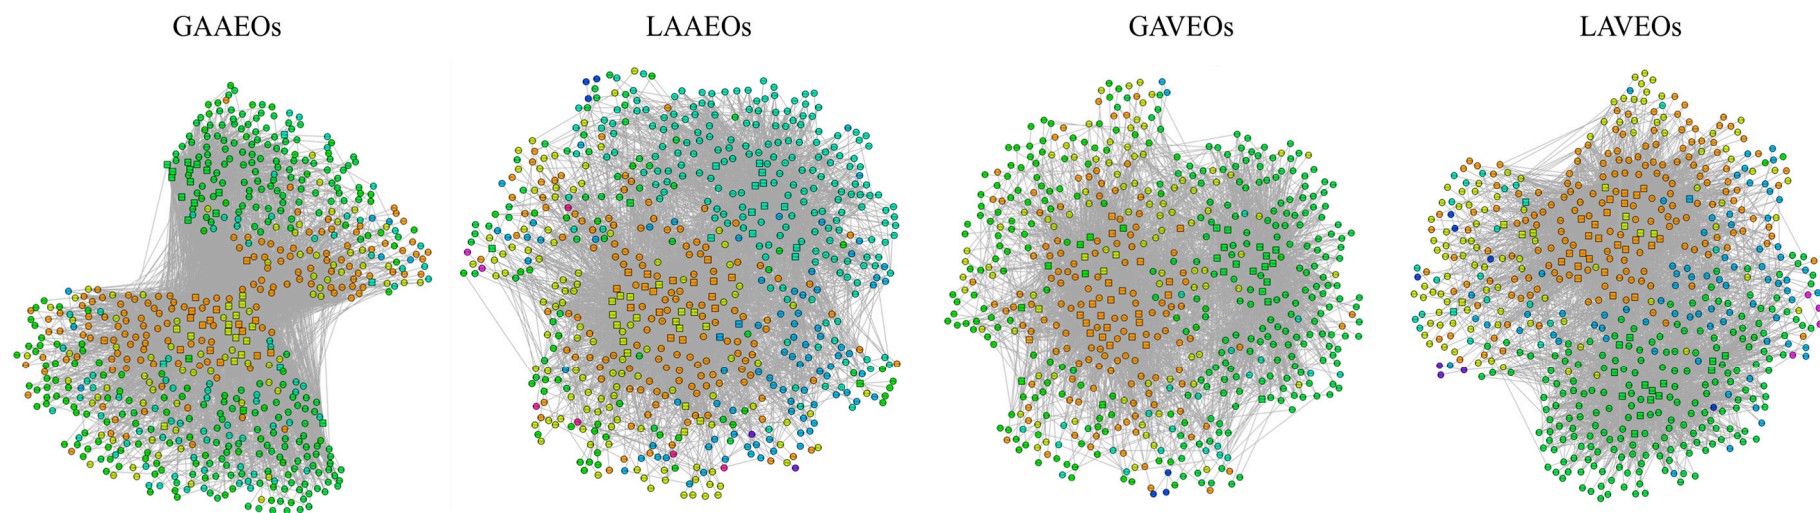

**Figure S3.** R cluster analysis. The related ingredients, targets and pathways information resulted in a data set which was converted to an igraph graph with “igraph” software package. Different communities were marked in different colors by a R\_rainbow, and nodes with similar colors have higher associativity.

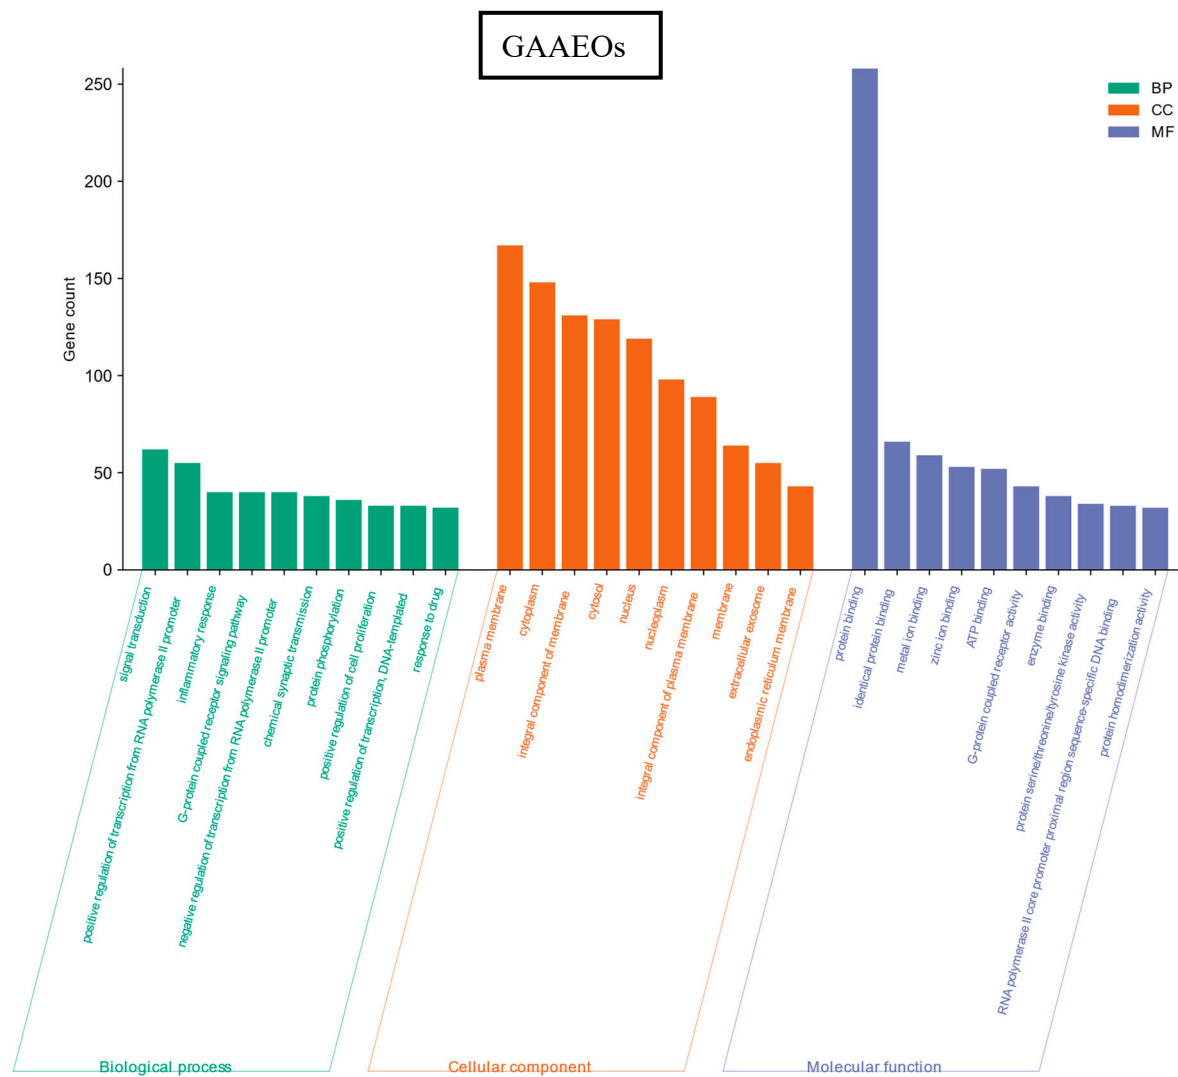



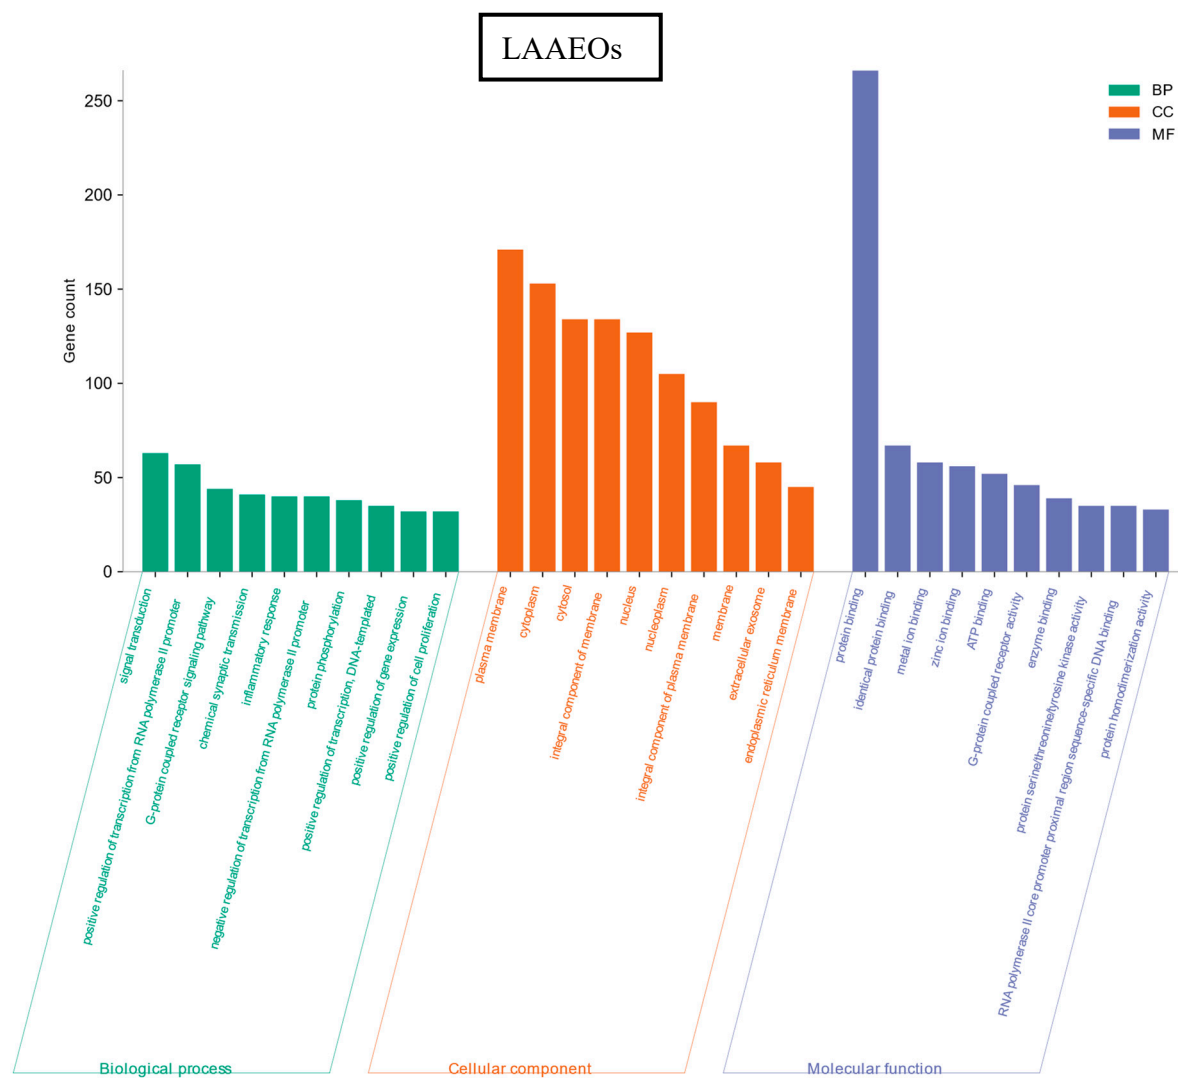

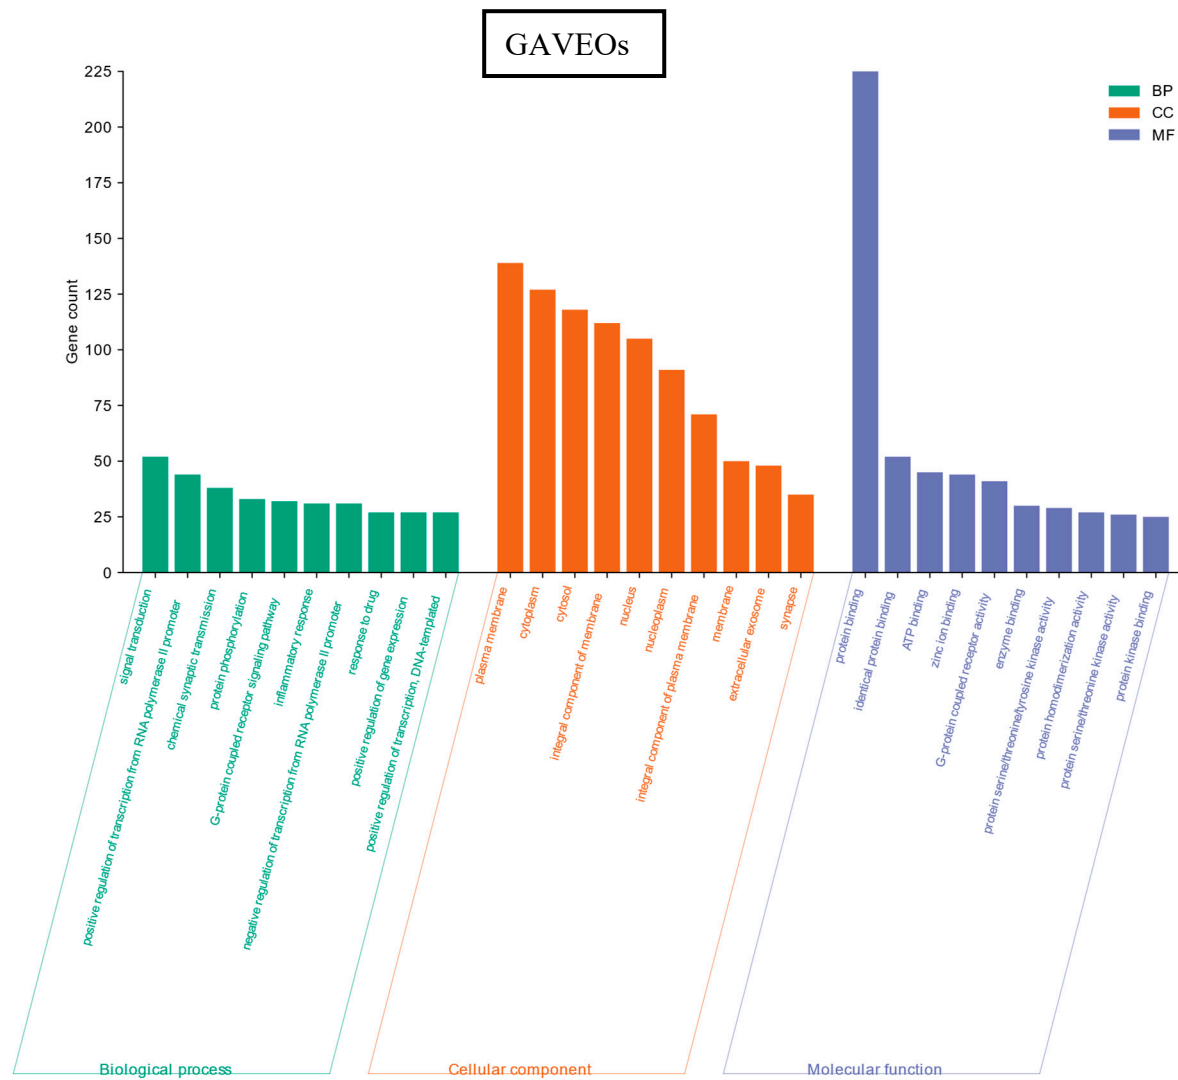

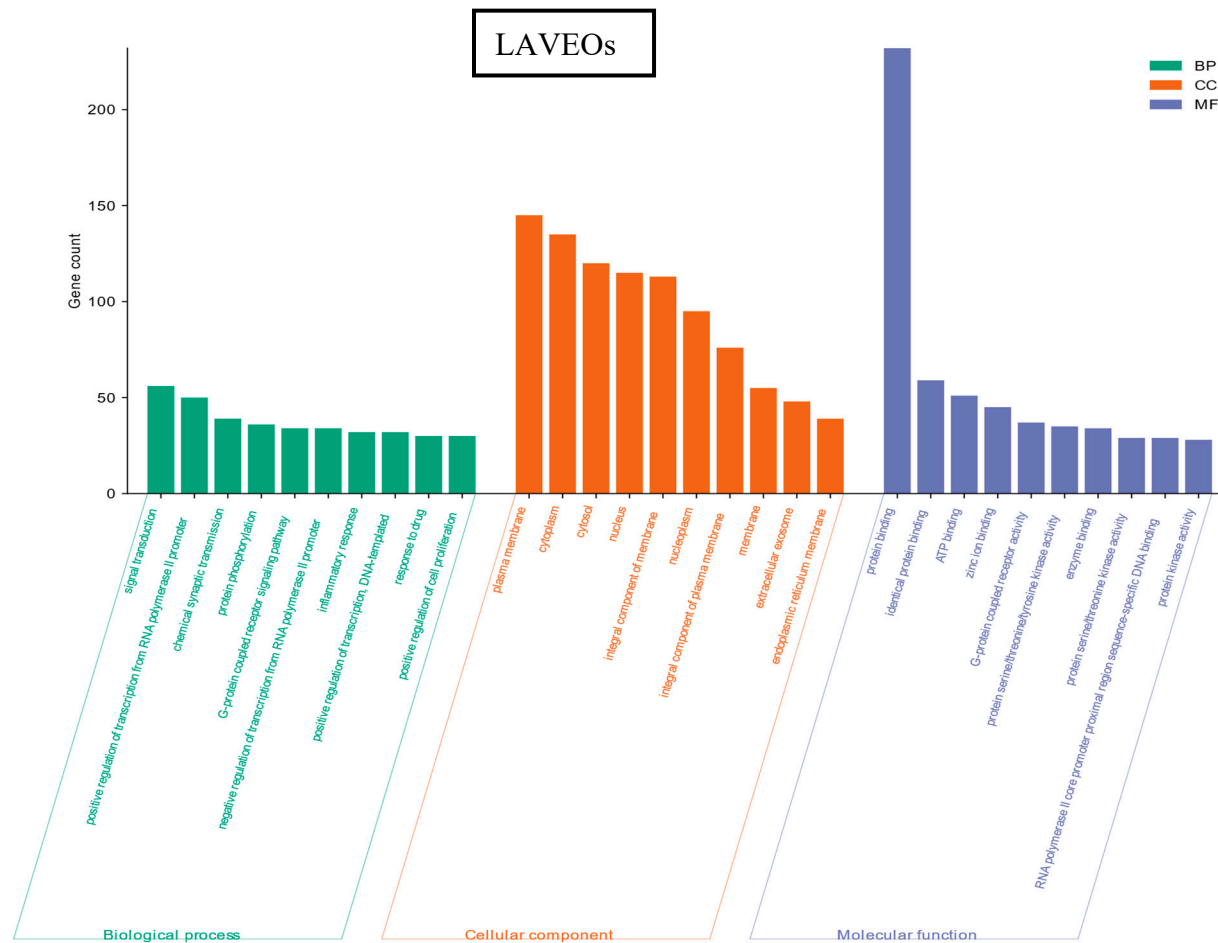

**Figure S4.** Gene Ontology (GO) analysis. Main Gene Ontology terms enriched by major hubs from cluster Profiler. The top 10 terms of BP, MM, and CC measured by adjusted value were selected to demonstrate.

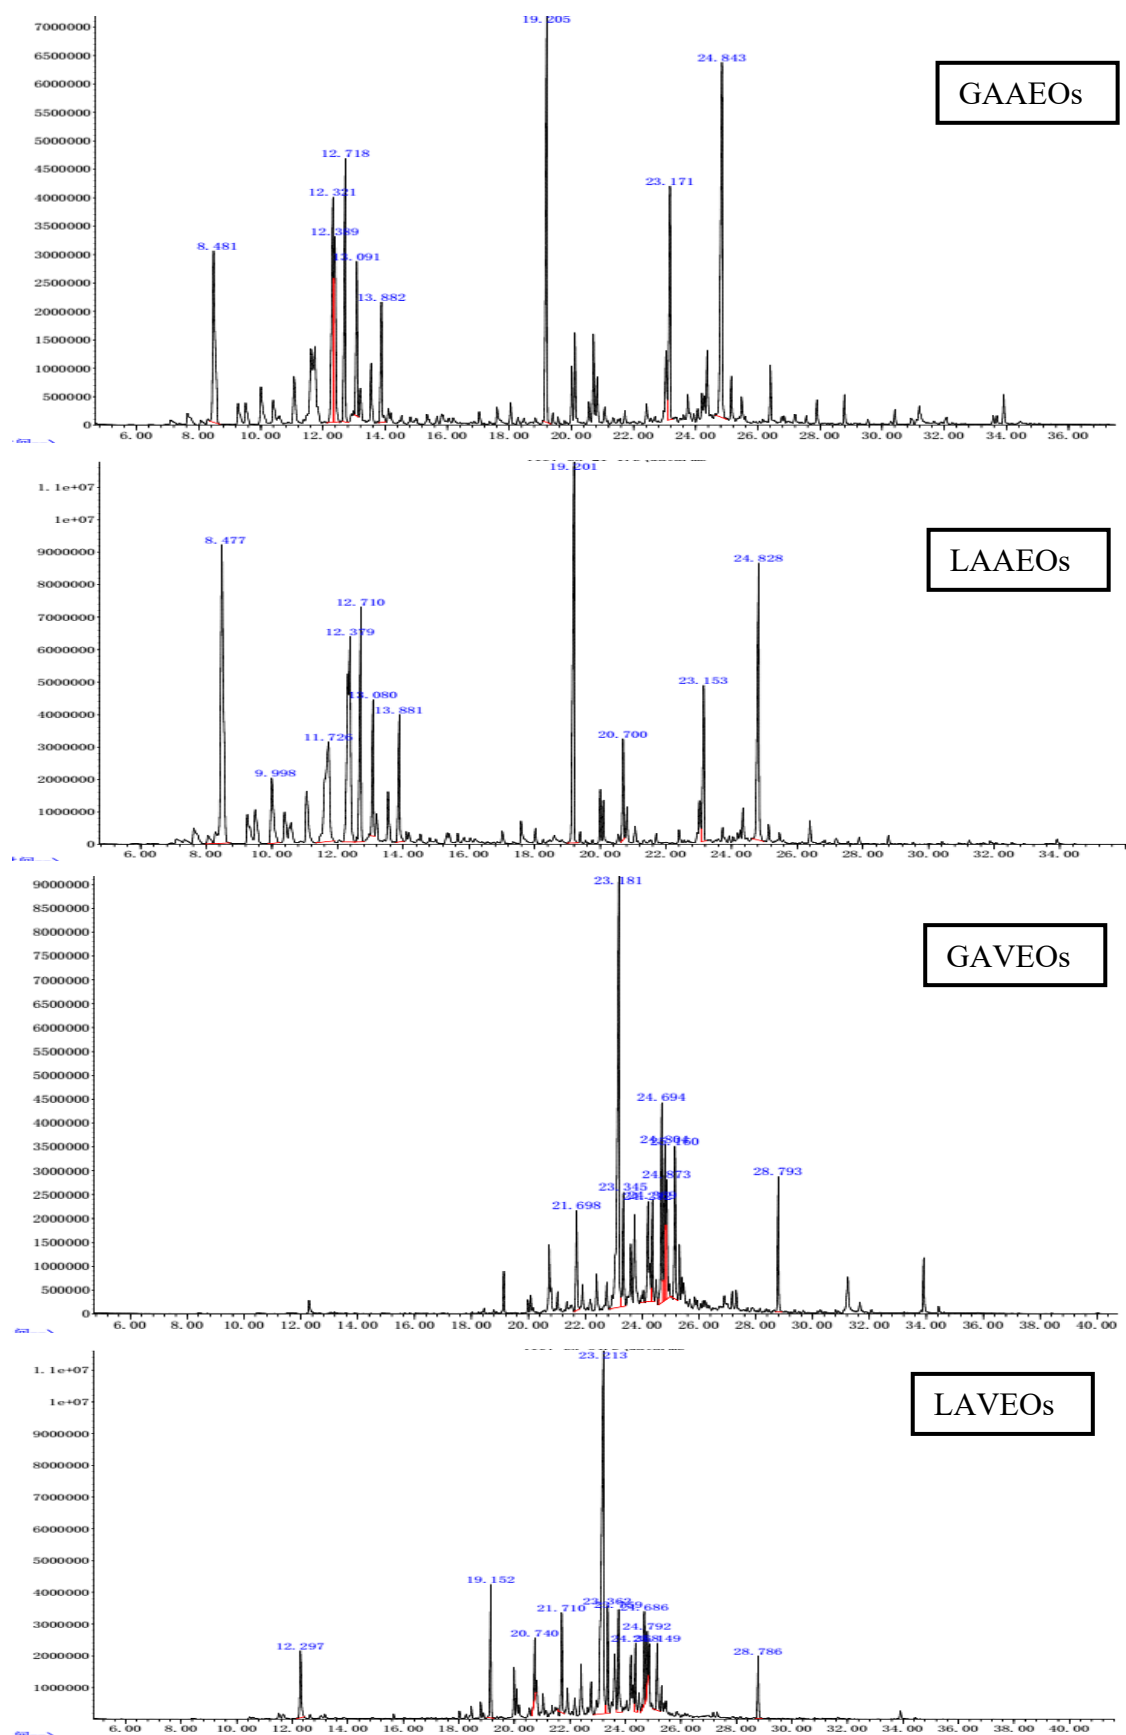

**Figure S5** Total Ions Chromatograms (TIC) of EOs from *Artemisia*.
